# Supplementary material for: Ultra-tough and super-robust hydrogel constructed through carbon dots induced crystallization domains integrated orientation regulation based on “pinning effect”
Source: Research Square preprint supplement (doi:10.21203/rs.3.rs-5586196/v1), 2024-12-19
Supplement: Supplementary file 1 [file ee376db3935bda3465a68645.docx]

Supplementary Information

**Ultra-tough and super-robust hydrogel constructed through carbon dots induced crystallization domains integrated orientation regulation based on “pinning effect”**

Huanxin Huoa,b,#, Jingjie Shena,b,#, Haoran Shia,b, Hongxing Yanga,b, Xin Duana,b, Yihong Gaoa,b, Yumeng Chena,b, Feng Kuanga,b, Hongshan Lia,b, Jianyong Wana,b,*, Guanben Dua,b,c,*, Long Yanga,b,c,*

a Yunnan Province Key Lab of Wood Adhesives and Glued Products, Southwest Forestry University, Kunming 650224, China

b Yunnan International Joint R&D Center of Wood and Bamboo Biomass Materials, Southwest Forestry University, Kunming 650224, China

c International Joint Research Center for Biomass Materials, Southwest Forestry University, Kunming 650224, China

# These two authors contributed to this work equally

*Corresponding Authors

**Corresponding:** jywan@swfu.edu.cn (J. Wan); [guanben@swfu.edu.cn](mailto:guanben@swfu.edu.cn) (G. Du); lyang@swfu.edu.cn (L. Yang)

**Materials**

PVA (PVA-1799), citric acid (CA), sodium citrate, malic acid, and tannic acid were obtained from Shanghai Adamas Reagent Co., Ltd. Eucalyptus bark was obtained from a local market.

**Preparation of citric acid carbon dots (CDs)**

Citric acid CDs were prepared using a hydrothermal method. First, citric acid (1 g) was dissolved in 100 mL of deionized water and reacted at 180 ℃ for 8 hours. The solution was then allowed to cool to room temperature to obtain the CDs.

**Preparation of PVA hydrogel**

PVA was dissolved in deionized water and stirred at 90 ℃ for 3 hours to obtain PVA solutions with different concentrations. The homogeneous solution was then poured into silica molds, frozen at -20 ℃ for 12 hours, thawed at room temperature for 2 hours, and subjected to three freeze-thaw cycles to obtain the PVA hydrogel.

**Preparation of PVA-CA hydrogel**

PVA was dissolved in the CA solution and stirred at 90 ℃ for 3 hours to obtain PVA-CA solutions with different concentrations. The homogeneous solution was then poured into silica molds, frozen at -20 ℃ for 12 hours, thawed at room temperature for 2 hours, and subjected to three freeze-thaw cycles to obtain the PVA-CA hydrogel.

**Preparation of PVA-CDs hydrogel**

PVA was dissolved in the CDs solution and stirred at 90 ℃ for 3 hours to obtain PVA-CDs solutions with different concentrations. The homogeneous solution was then poured into silica molds, frozen at -20 ℃ for 12 hours, thawed at room temperature for 2 hours, and subjected to three freeze-thaw cycles to obtain the PVA-CDs hydrogel.

**Preparation of PVA-CDs-S hydrogel**

The PVA-CDs hydrogels were soaked in a 2 mol L-1 sodium citrate solution for 12 h to obtain PVA-CDs-S hydrogel.

**Preparation of PVA-CDs-SP hydrogel**

PVA-CDs-S hydrogel was then gradually stretched to 300% of its original length and subsequently soaked in a sodium citrate solution for another 12h to obtain PVA-CDs-SP hydrogel. The hydrogel codes and the weight fractions of each component in the hydrogels were summarized in **Supplementary** **Table 1**. Different CDs prepared with malic acid, tannic acid and eucalyptus bark to verify the universality. All parameters were consistent with those used in the preparation of PVA-CDs-SP hydrogels.

**Mechanical performance test**

The mechanical properties of the hydrogels were evaluated using an ETM-10B Universal Mechanical Testing Machine (Shenzhen Vance Testing Machine Co., Ltd.) equipped with a 500 N load cell, at a room temperature of 25 ± 3 ℃ and a relative humidity of 70 ± 5%. The ends of the samples were wrapped in newspaper to minimize slippage, and the tensile speed was set to 100 mm min-1 unless otherwise specified. For cyclic tensile testing, the hydrogel samples were stretched to a fixed strain at a rate of 80 mm min-1, followed by immediate unloading at the same rate, without waiting for the sample to equilibrate before the next cycle. Young's modulus was determined from the initial slope of the stress-strain curve, toughness was estimated from the area under the curve, and energy dissipation was calculated from the area between the loading and unloading curves.

**Electrochemical property test**

The electrical and sensing properties of the hydrogels were evaluated using an electrochemical workstation (CHI660E, Shanghai, China). The impedance spectrum was recorded over a frequency range of 0.1 to 100,000 Hz, and the relative change in resistance was calculated as (R0 - R)/R0, where R and R0 represent the resistance after applying strain and the initial resistance, respectively. Conductivity (σ) was calculated as:

σ = I/ (R × S)

where I, R, and S represent the current, resistance, and cross-sectional area of the hydrogel, respectively.

**Fourier-transform infrared (FT-IR)**

Characterization was performed using a Thermo Scientific iN10 Fourier transform infrared spectrometer.

**Raman Spectroscopy Analysis**

Raman spectra of the samples were acquired using a Thermo Fisher DXR 2xi confocal Raman spectrometer with a 532 nm laser at 5 mW laser intensity.

**X-ray Diffraction (XRD) Analysis**

X-ray diffraction (XRD) analysis of the samples on the slides was performed using a Bruker D8 Advance XRD system with Cu Kα radiation (λ = 1.5418 Å) at a scanning speed of 10°/min.

**Small-Angle X-ray Scattering (SAXS) Measurements**

SAXS measurements were conducted using an Anton Paar SAXSpoint2.0 with a Cu target (Kα radiation, λ = 0.154184 nm) and an X-ray wavelength (λ) of 1.53 nm. The sample-to-detector distance was 300 mm, and the signal was collected using a 2D hybrid photon counting detector (EIGER R 1M). The scattered data were analyzed using Fit 2D software, and the SAXS 2D patterns were integrated over a fan-shaped region to obtain the one-dimensional scattering profile. The scattering vector (q) was calculated using the equation:

q = 4πsinθ/ λ

where, λ is the X-ray wavelength and θ is the scattering angle. The one-dimensional curve was integrated, and the average distance between adjacent crystalline domains was then calculated using Bragg's law:

L = 2π/qmax

Where, qmax is the value of q at the maximum scattering intensity.

**X-ray photoelectron spectroscopy (XPS)**

PVA, PVA-CA, PVA-CDs, PVA-CDs-S and PVA-CDs-SP were measured by X-ray photoelectron spectroscopy (XPS) using an X-ray photoelectron spectrometer (Thermo Fisher Scientific, USA).

**Low-field Nuclear Magnetic Resonance (NMR) Analysis**

The proton spin-spin relaxation time (T2) of the hydrogel was measured using a MesoMR23-060H-I nuclear magnetic resonance imaging analyzer, with a proton resonance frequency of 21 MHz (0.5 T), a resonance frequency of 23 MHz, a coil diameter of 25 mm, and a magnet temperature of 32 ℃. The correlation time (𝜏c) of water molecular motion was calculated using the Bloembergen-Purcell-Pound equation, thus enabling the quantitative analysis of water dynamics:

Here, C is the water constant (5.33 × 109 S-2), and 𝜔0 is the Larmor frequency.

**Differential Scanning Calorimetry (DSC) Analysis**

The gelation point, melting peak of the crystallization domain, and enthalpy change of the hydrogels were determined using a NETZSCH DSC 3500. First, the mass (M) of the freeze-dried sample was measured, and the sample was then heated from -80 ℃ to 250 ℃ at a rate of 10 ℃ min-1 in a nitrogen atmosphere. The peak observed between 200 ℃ and 250 ℃ was the melting peak of the hydrogel crystallization domain, and the area under this peak was denoted as *Hcrystalline*. The crystallinity of the crystallization domain can be calculated as:

mcrystalline = M *Hcrystalline* /

where, = 168.6 J g-1, represents the 100 wt% enthalpy of melting. The crystallinity (X_dry) of the dry sample can then be calculated as:

Xdry = mcrystalline/ M

**Transmission electron microscope (TEM) test**

TEM images were acquired using a transmission electron microscope, the FEI Talos F200S (USA), at an accelerating voltage of 200 kV.

**Supplementary Table 1. The compositions of the PVA, PVA-CA and PVA-CDs hydrogels.**

| **Sample** | **PVA (g)** | **CA (g)** | **CDs (g)** | **Water (g)** |
| --- | --- | --- | --- | --- |
| PVA | 10 |  |  | 90 |
| PVA-CA | 10 | 8 |  | 72 |
| PVA15-CDs10 | 15 |  | 8.5 | 76.5 |
| PVA20-CDs10 | 20 |  | 8 | 72 |
| PVA25-CDs10 | 25 |  | 7.5 | 67.5 |
| PVA-CDs1 | 20 |  | 0.8 | 79.2 |
| PVA-CDs5 | 20 |  | 4 | 76 |
| PVA-CDs15 | 20 |  | 12 | 68 |

**Supplementary Movie 1.** The hydrogel bundle can support the weight of an adult male.

**Supplementary Movie 2.** The hydrogel bundle is capable of pulling a car.


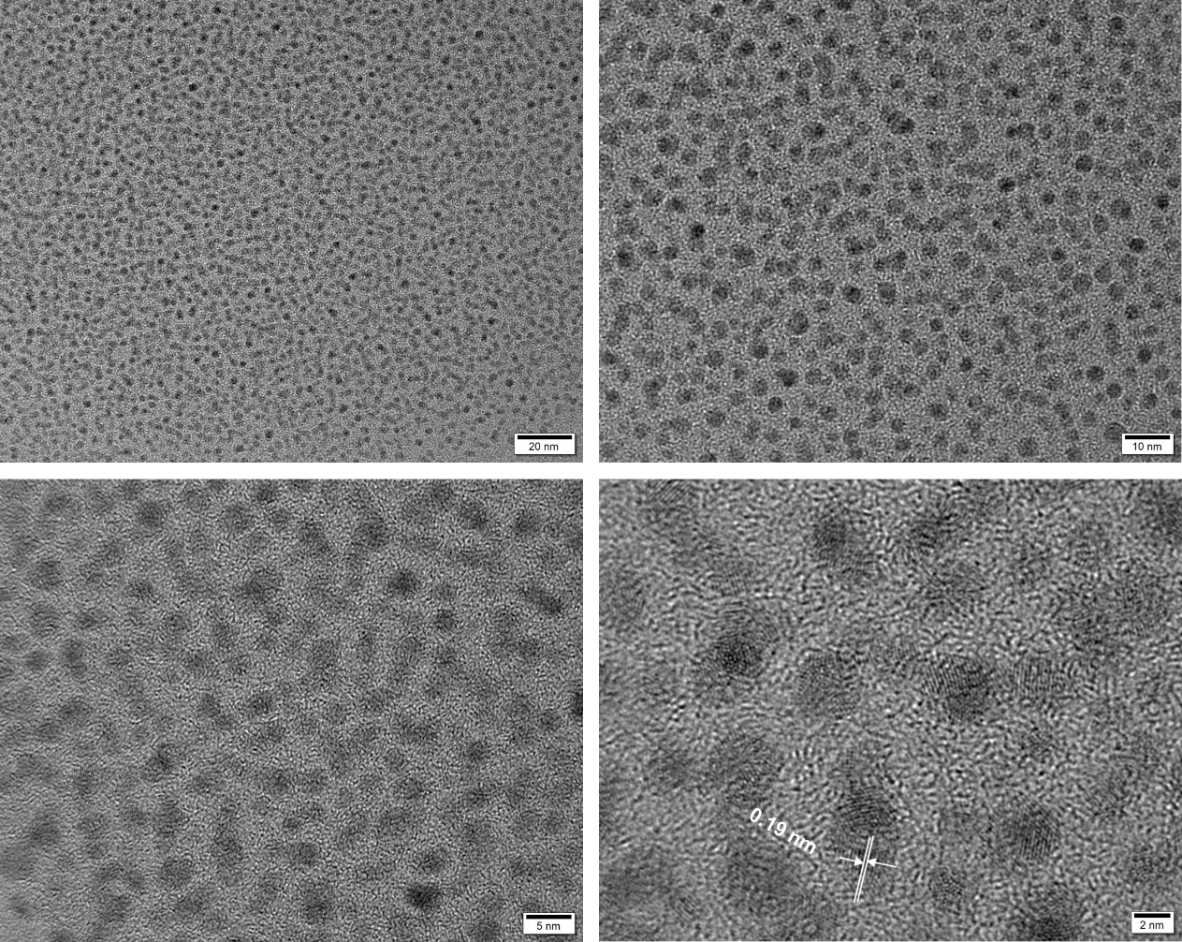


**Supplementary Figure 1.** The TEM images of CDs.


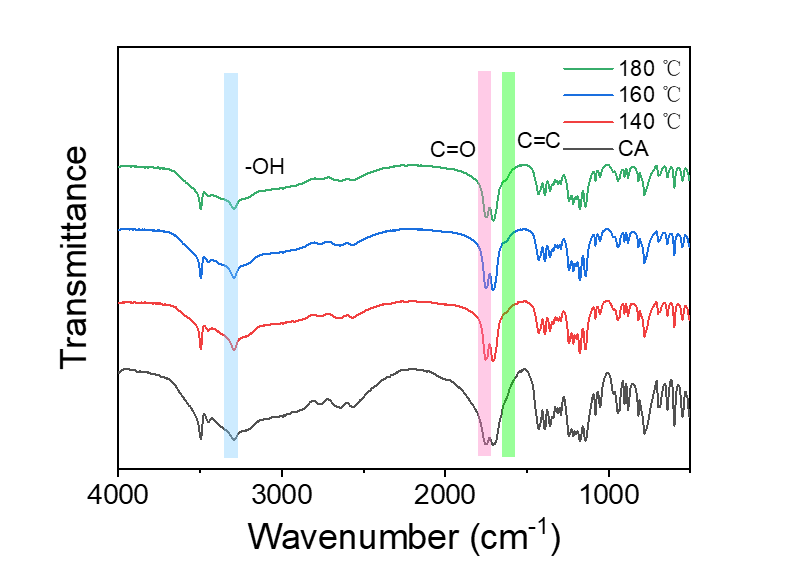


**Supplementary Figure 2.** FT-IR spectra of CA and CDs prepared at different temperatures.


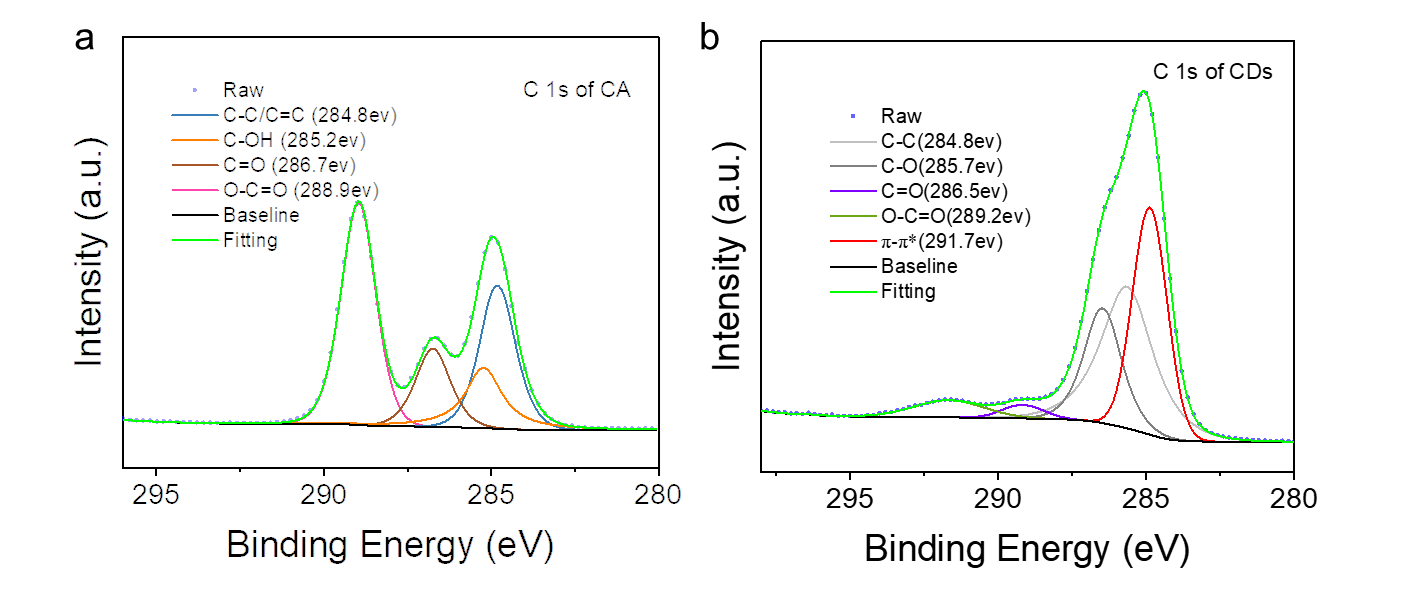


**Supplementary Figure 3. XPS analysis of CA and CDs.** **a** C1s scan of CA. **b** C1s scan of CDs. (C) O1s scan of CDs.


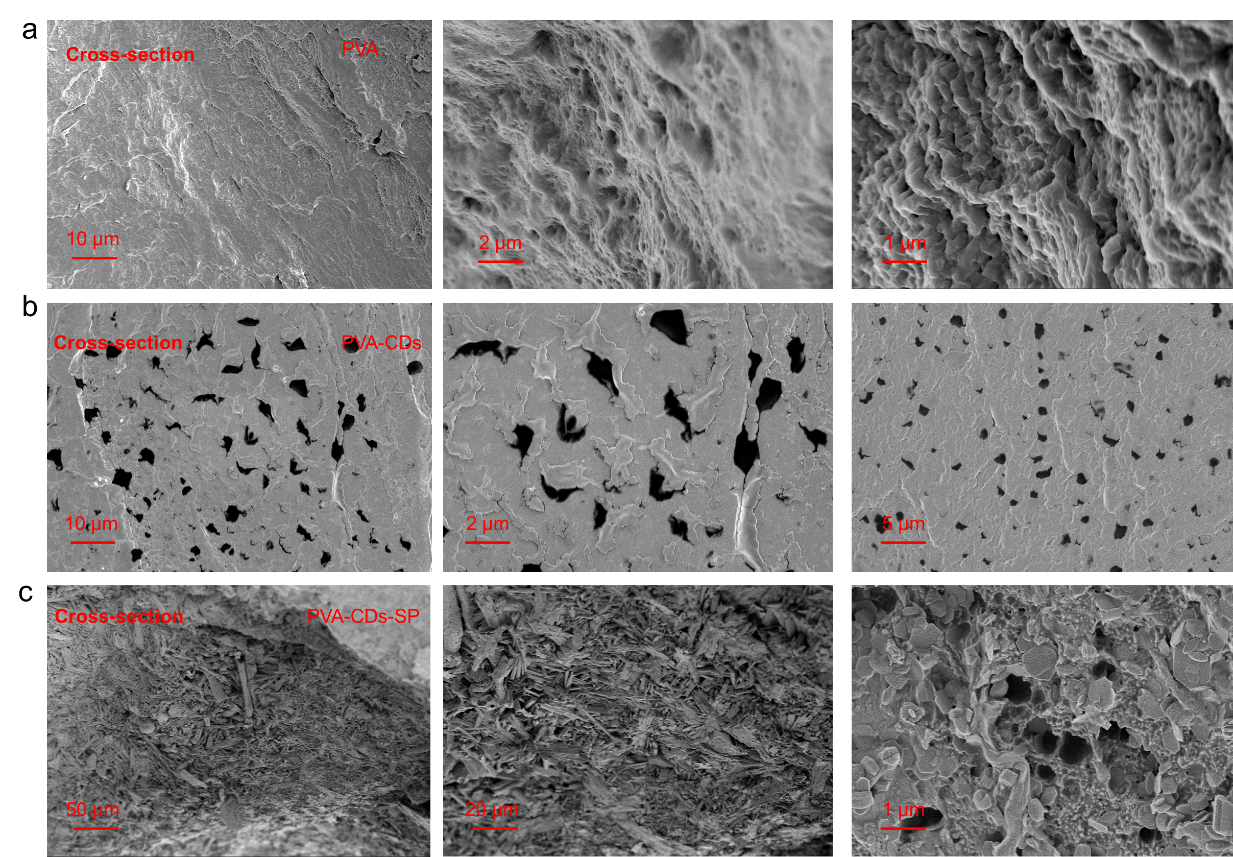


**Supplementary Figure 4. SEM of the cross-section of hydrogel. a** PVA. **B** PVA-CDs. **c** PVA-CDs-SP.


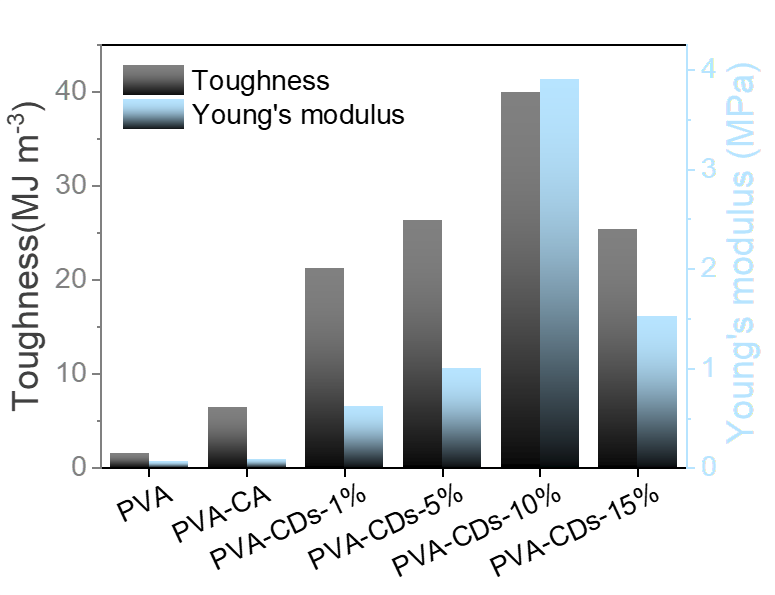


**Supplementary Figure 5.** Toughness and Young's modulus of PVA, PVA-CA and PVA-CDs at different concentrations of CDs.


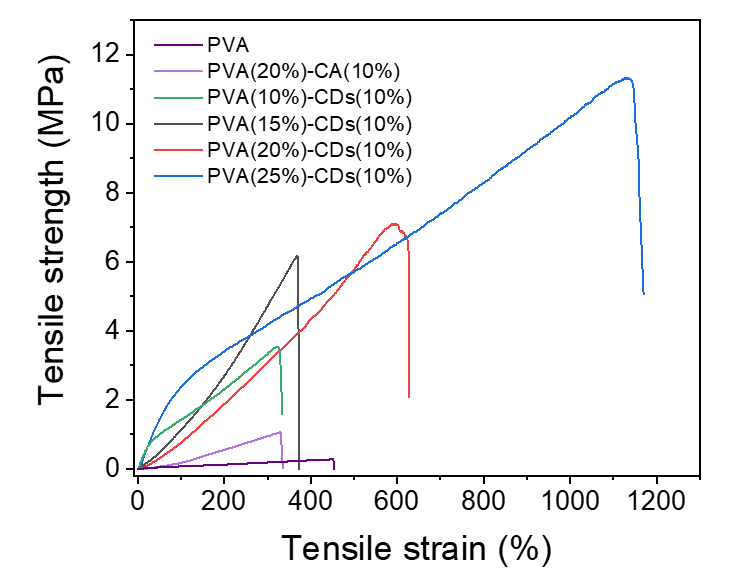


**Supplementary Figure 6.** Stress-strain curves of polyvinyl alcohol (PVA), PVA-citric acid (PVA-CA), and PVA-carbon dots (PVA-CDs) at different concentrations of PVA.


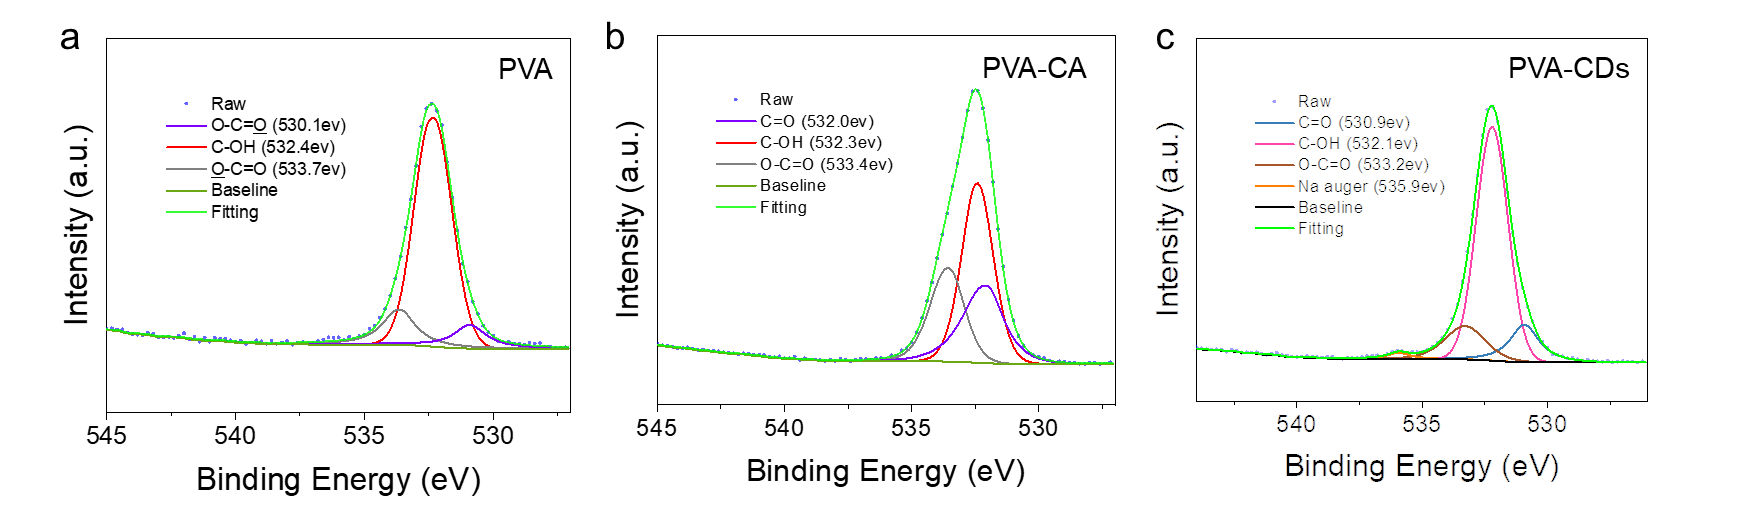


**Supplementary Figure 7.** **XPS analysis of O1s scan. a** PVA, **b** PVA-CA and **c** PVA-CDs.


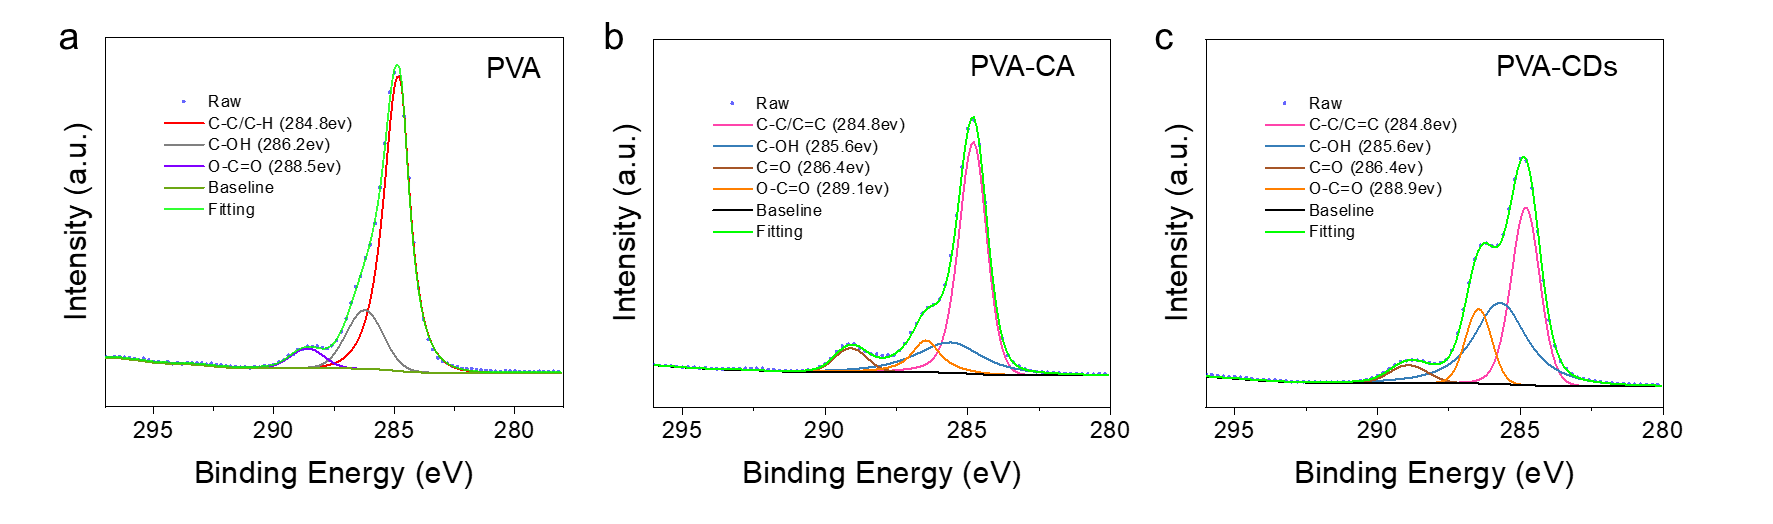


**Supplementary Figure 8. XPS analysis of C1s scan.** **a** PVA, **b** PVA-CA and **c** PVA-CDs.

**Supplementary Figure 9.** XRD profiles of the PVA, PVA-CA and PVA-CDs hydrogel.


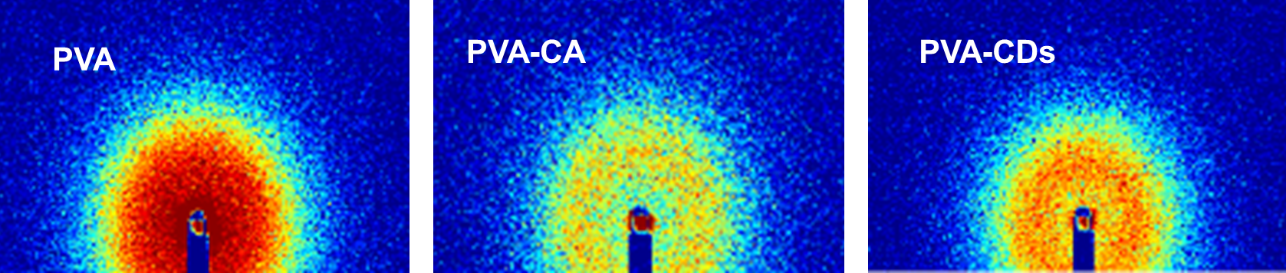


**Supplementary Figure 10.** 2D-SAXS patterns of the PVA, PVA-CA and PVA-CDs hydrogels.

**Supplementary Figure 11.** Average distances between neighboring crystalline domains in PVA-CDs, PVA-CDs-S and PVA-CDs-SP hydrogels.


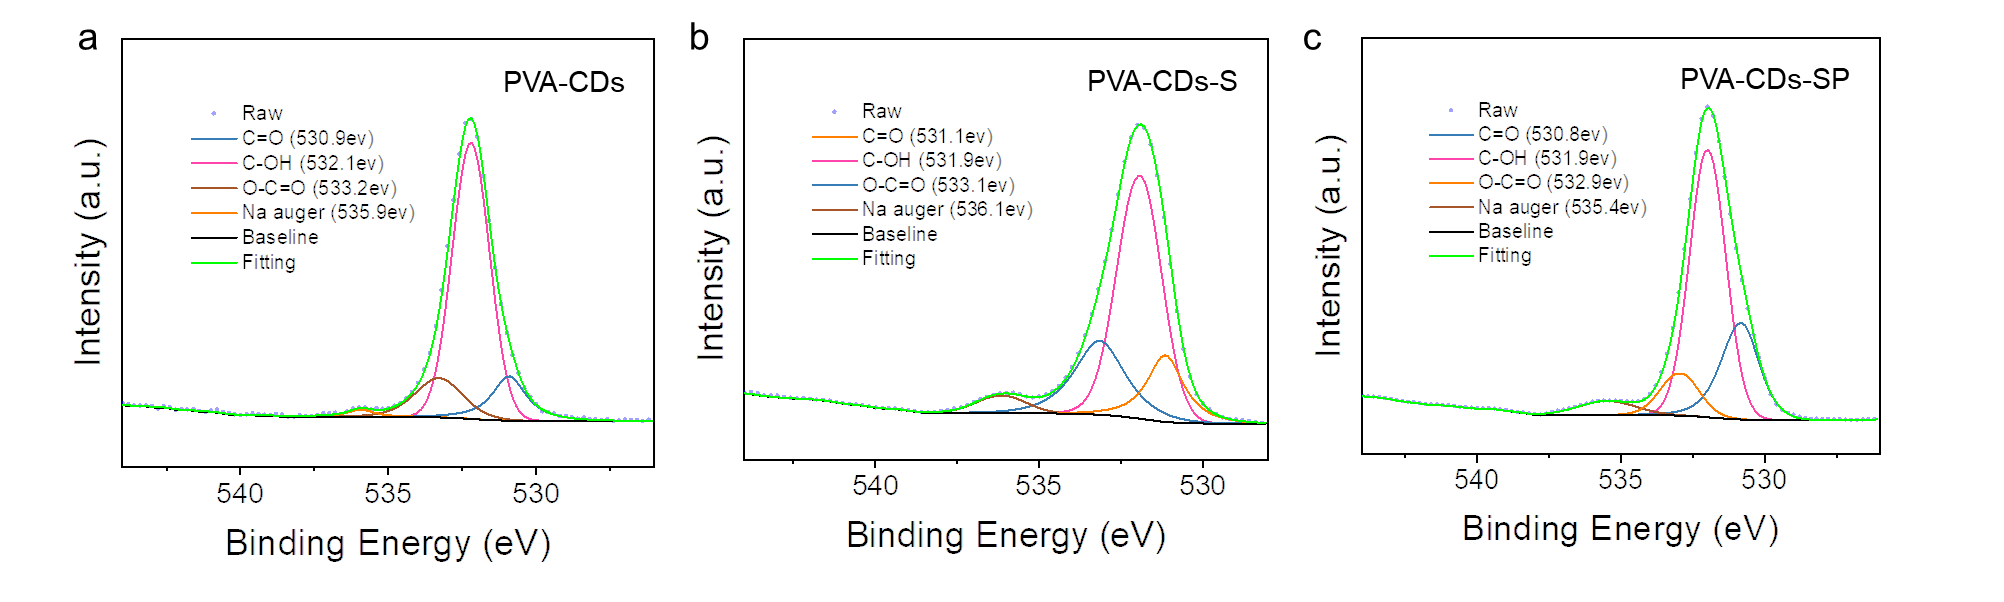


**Supplementary Figure 12.** XPS analysis of O1s scan. **a** PVA-CDs, **b** PVA-CDs-S and **c** PVA-CDs-SP hydrogels.


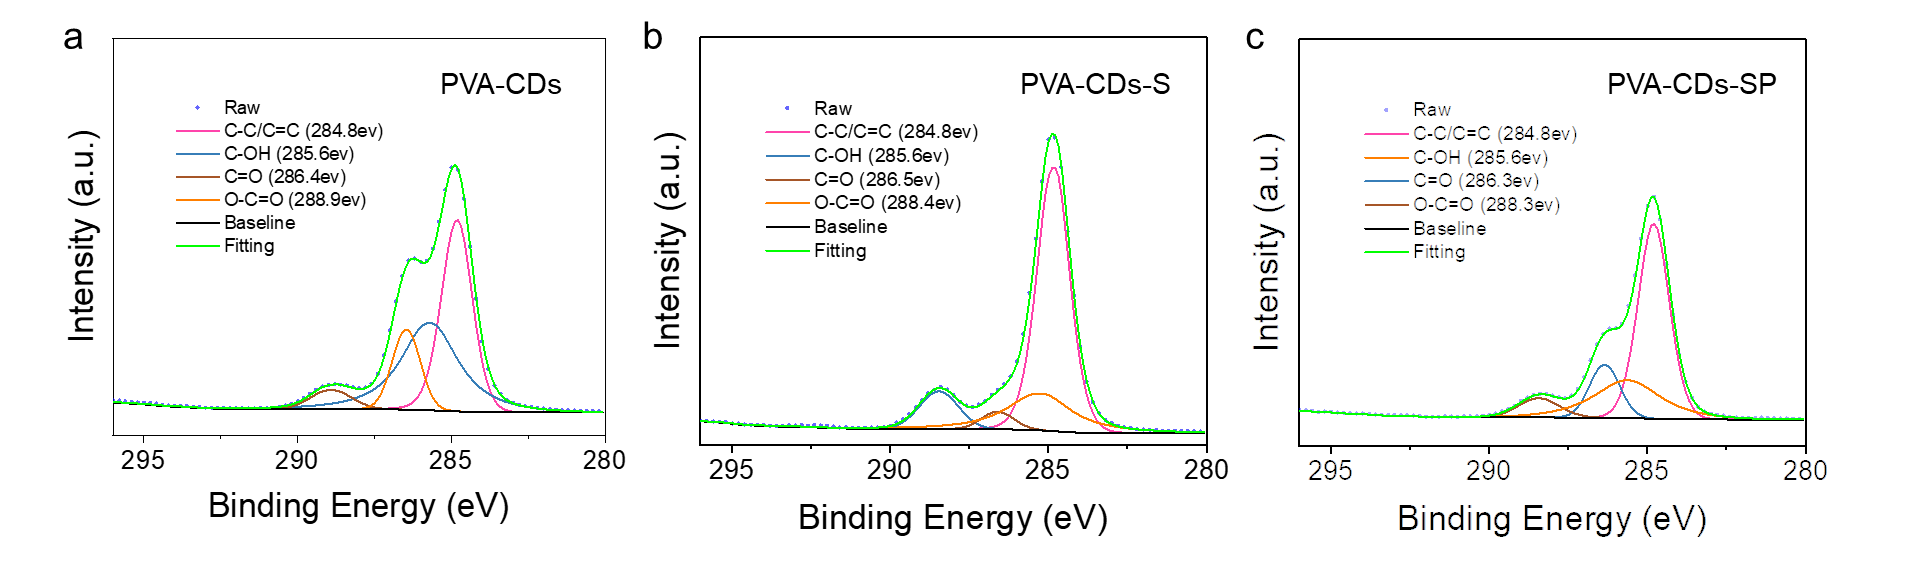


**Supplementary Figure 13.** **XPS analysis of C1s scan. a** PVA-CDs, **b** PVA-CDs-S and **c** PVA-CDs-SP hydrogels.

**Supplementary Figure 14.** XRD profiles of the PVA-CDs, PVA-CDs-S and PVA-CDs-SP hydrogels.


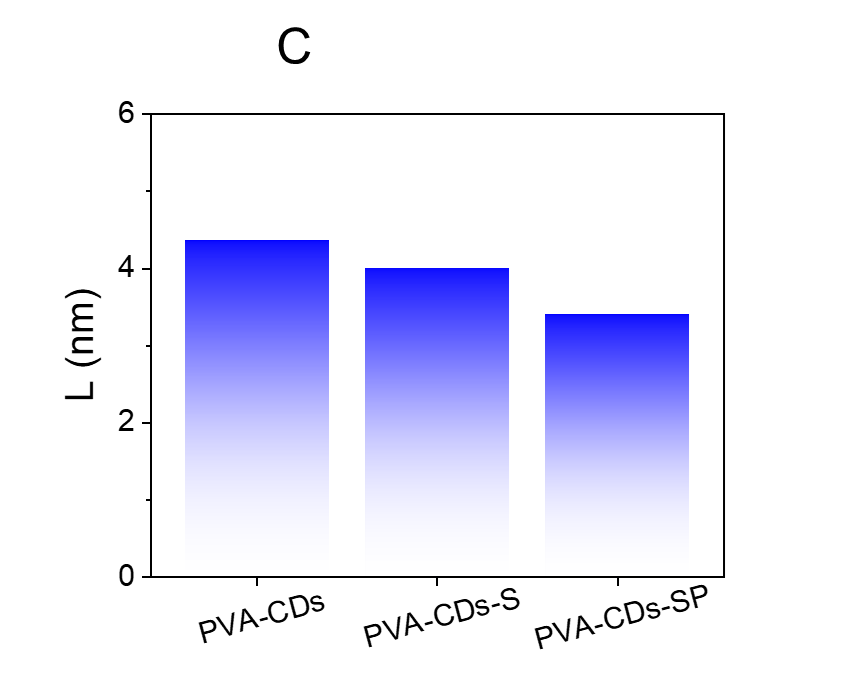


**Supplementary Figure 15.** The average distance between neighboring crystalline domains in the PVA-CDs, PVA-CDs-S and PVA-CDs-SP hydrogels.


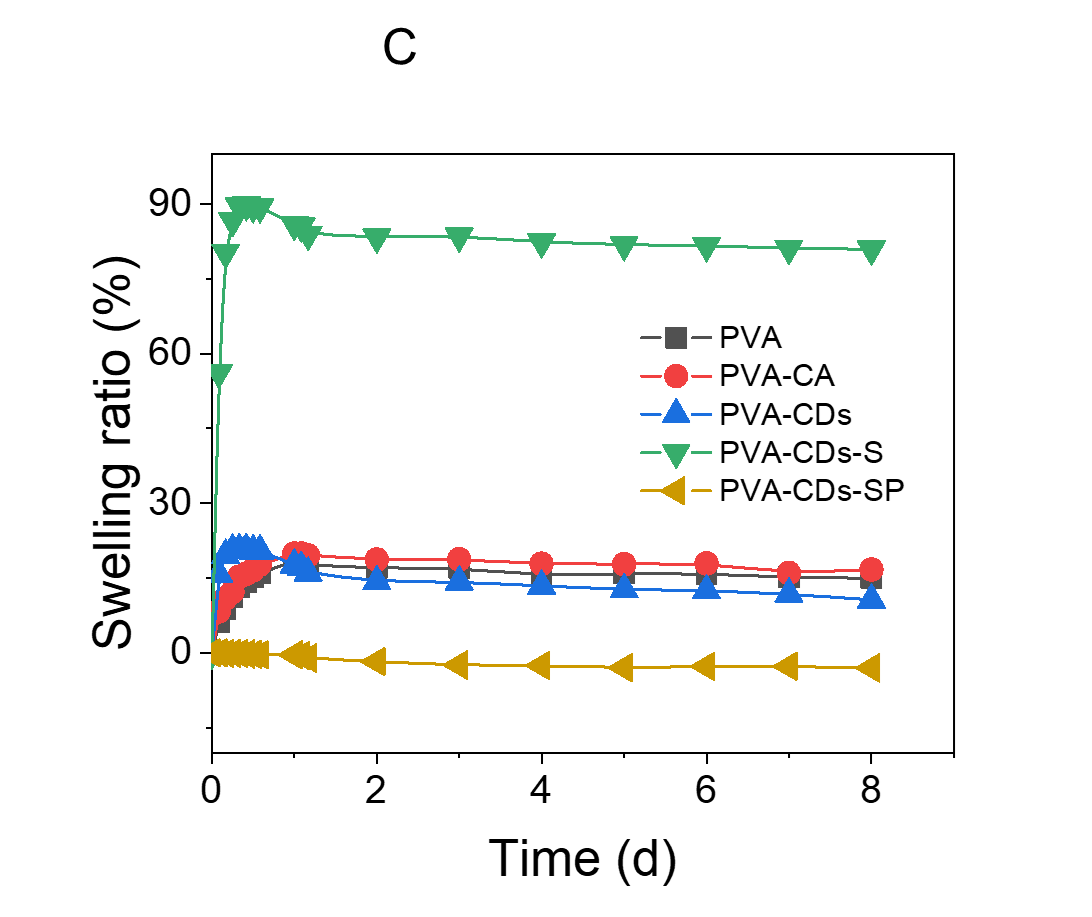


**Supplementary Figure 16.** Swelling kinetics of PVA, PVA-CA, PVA-CDs, PVA-CDs-S and PVA-CDs-SP hydrogels.


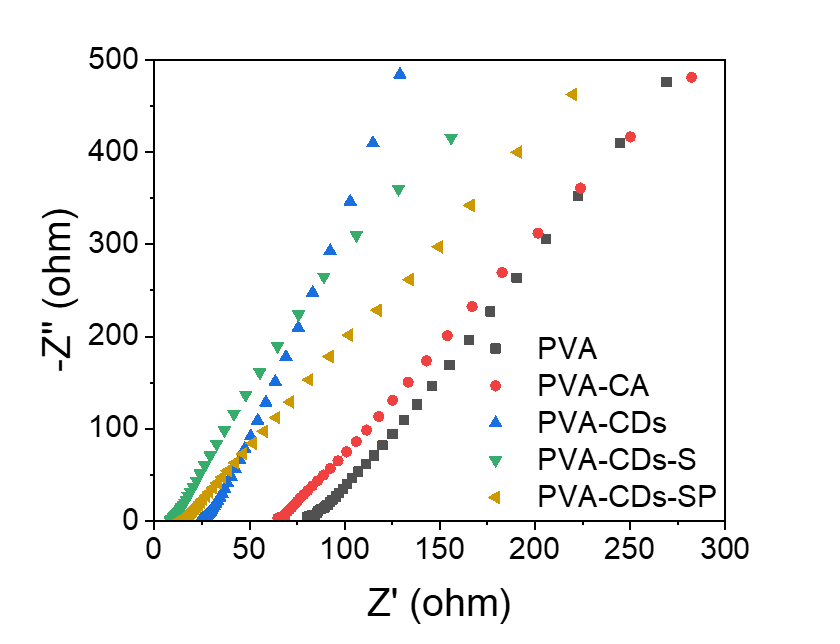


**Supplementary Figure 17.** Nyquist diagrams at PVA, PVA-CA, PVA-CDs, PVA-CDs-S and PVA-CDs-SP hydrogels.


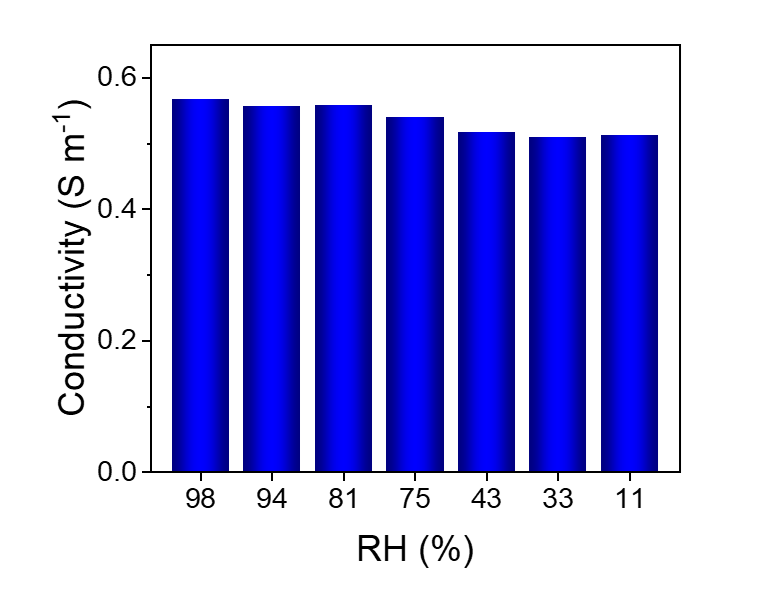


**Supplementary Figure 18.** Conductivity of PVA-CDs-SP hydrogels at various humidity levels.


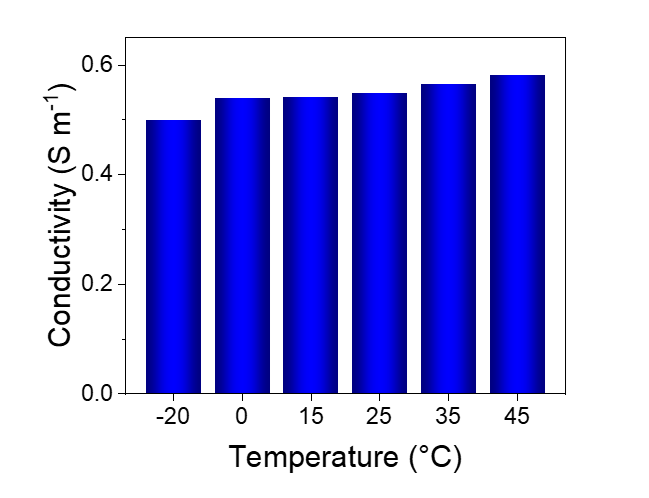


**Supplementary Figure 19.** Conductivity of PVA-CDs-SP hydrogels at varying temperatures.


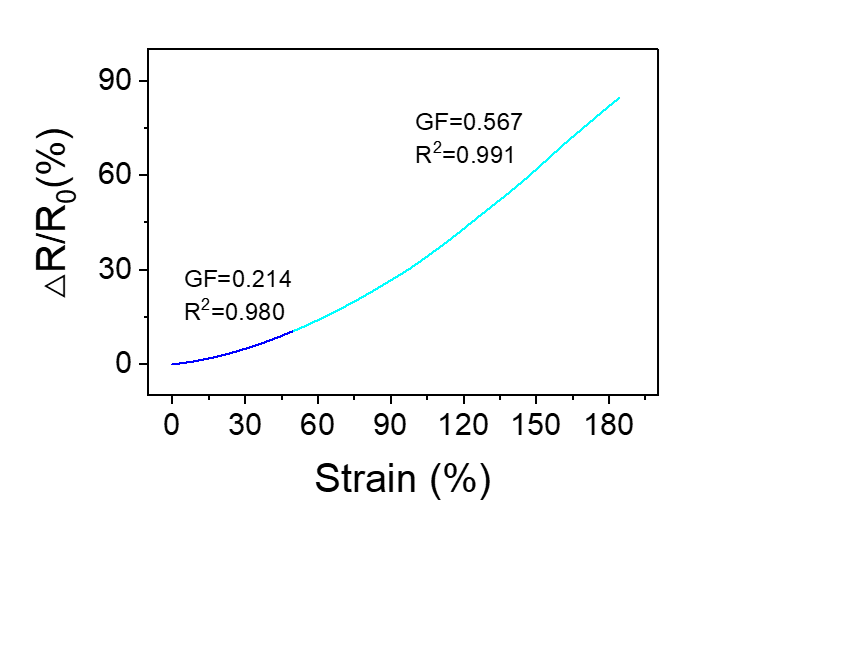


**Supplementary Figure 20.** Gauge factor of the PVA-CDs-SP hydrogels within the 970% strain range.
